# Supplementary material
Source: ML conference proceedings conference paper supplement (https://openreview.net/forum?id=BU5N-O8o9l9)
Supplement: supplementary_material [file attachment]

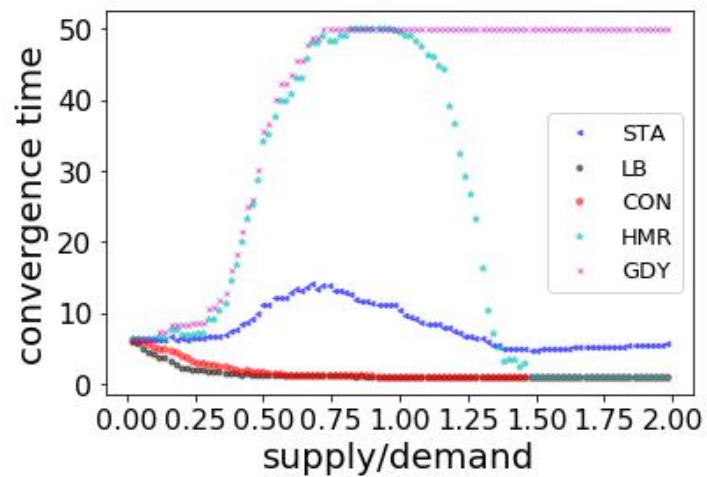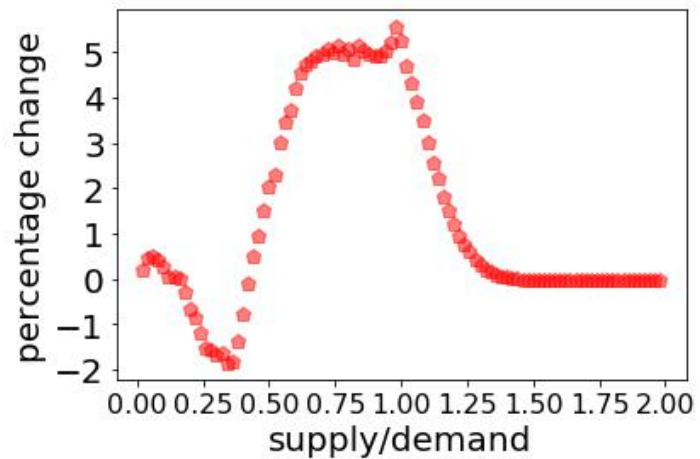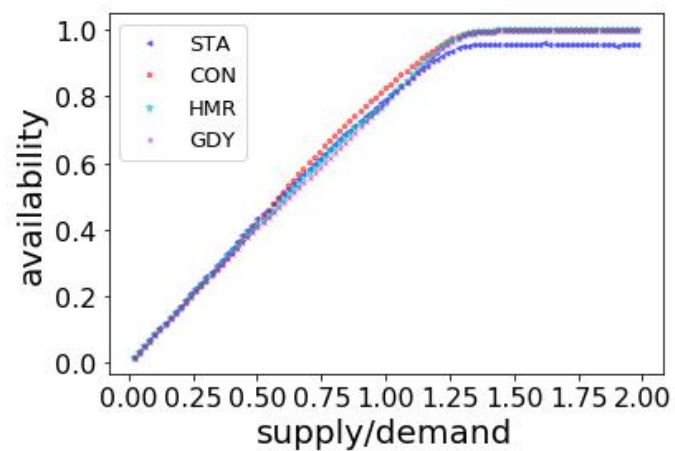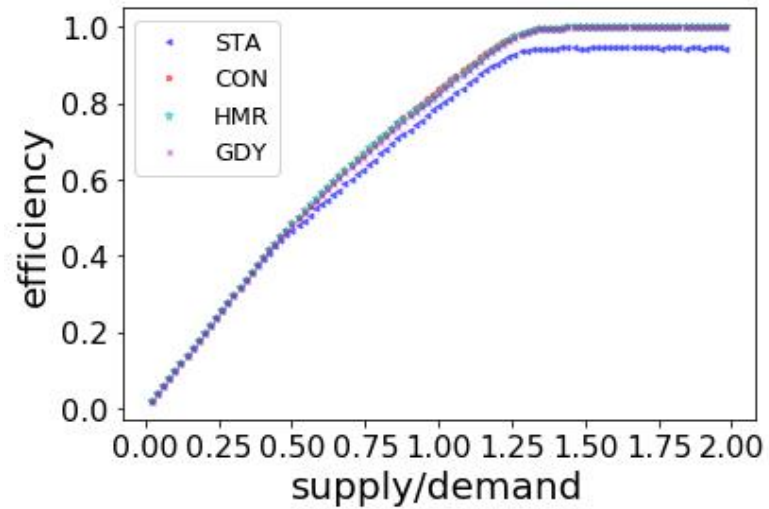

fairness objective, uniform PA power 10, 10 region

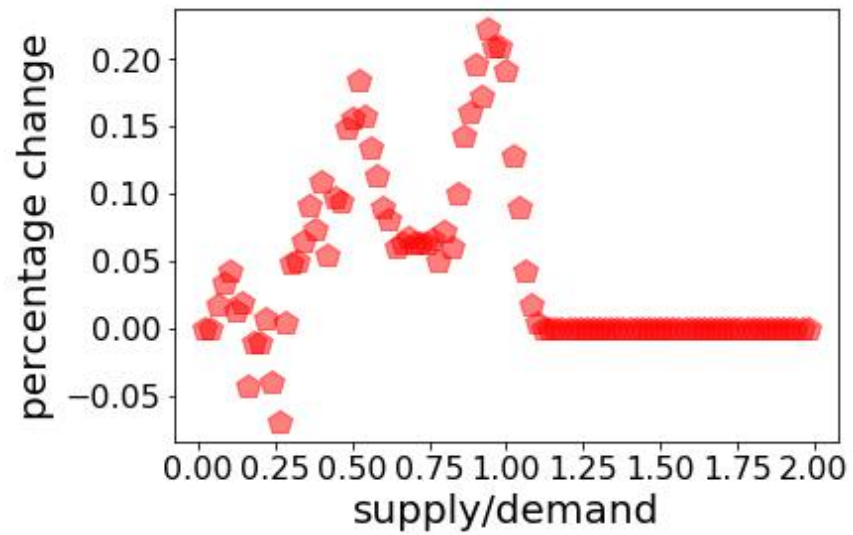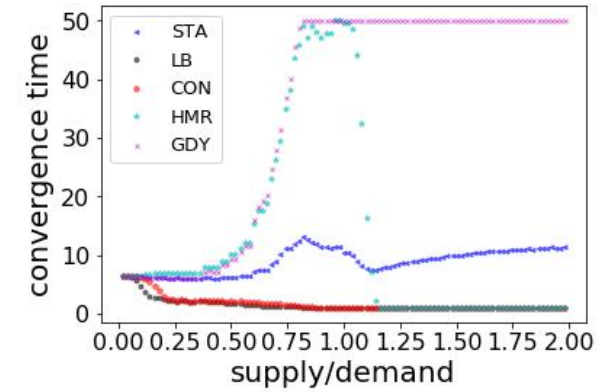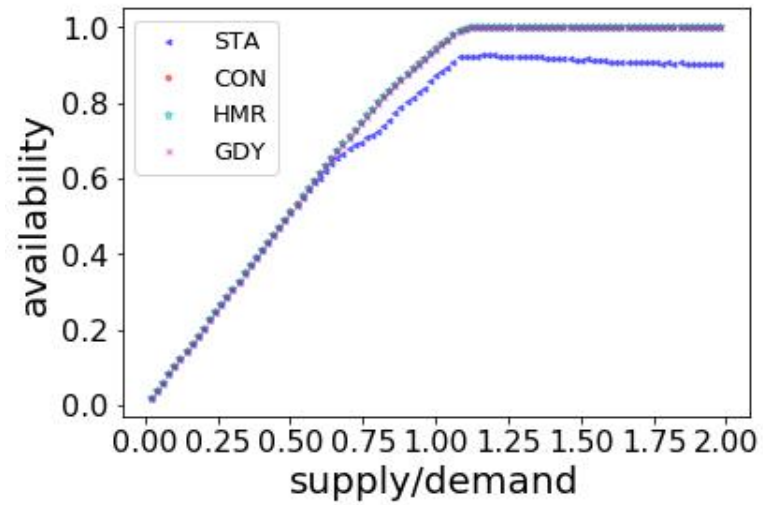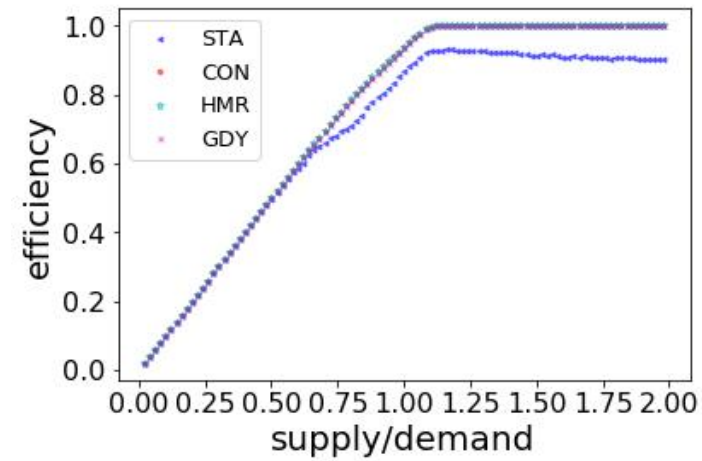

fairness objective, uniform , 10 region

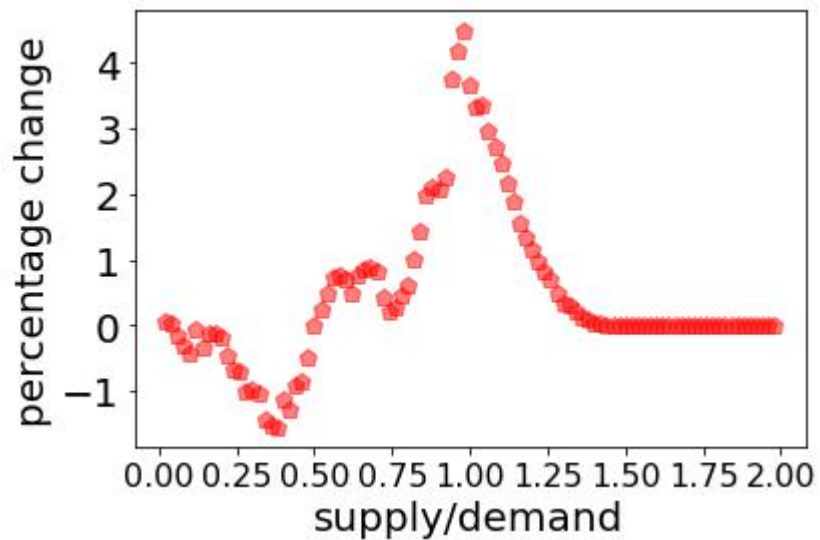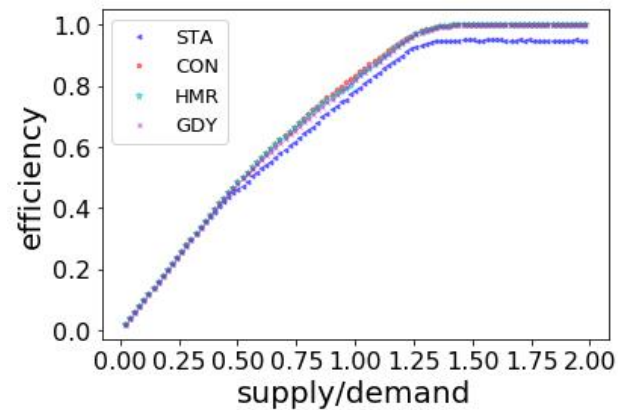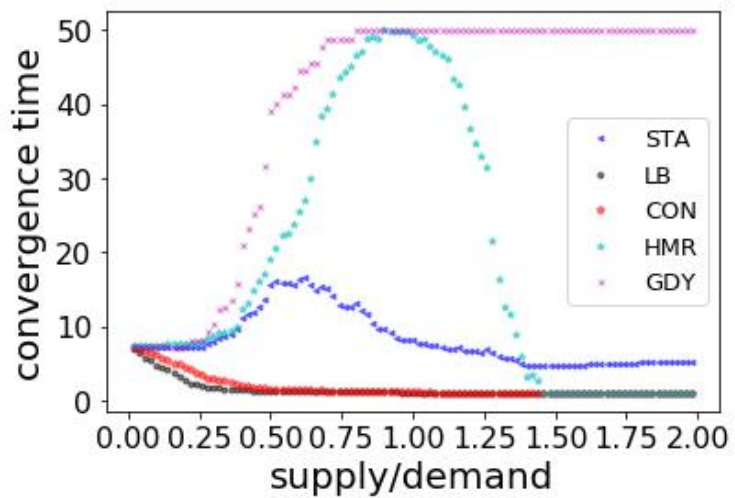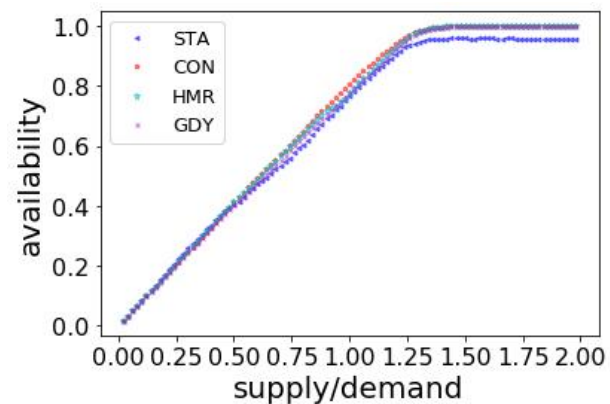

efficiency objective, uniform PA power 10, 10 region

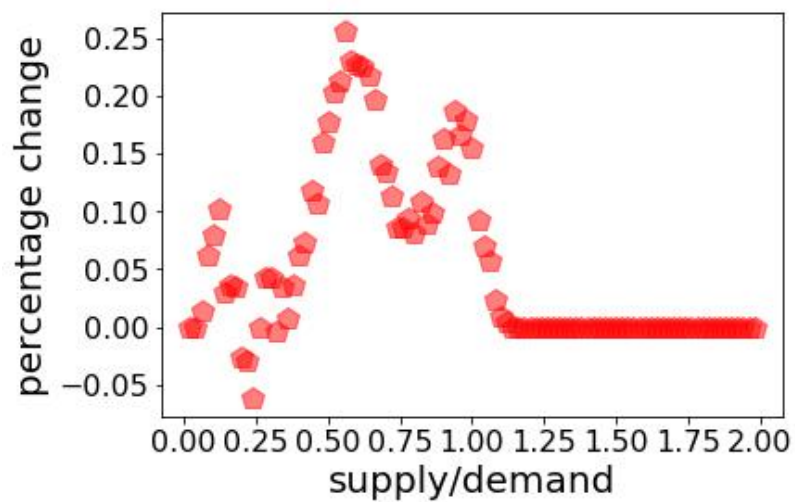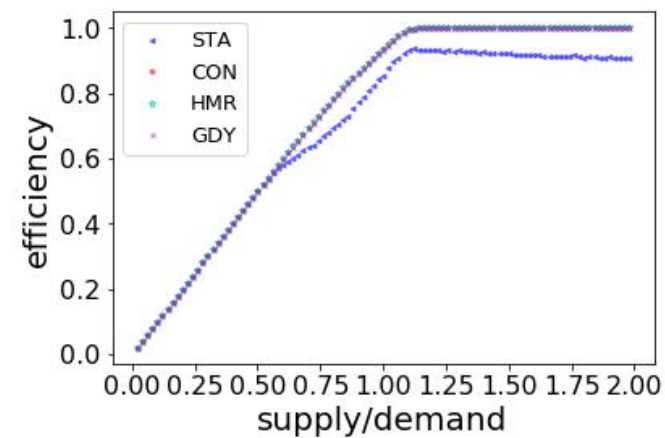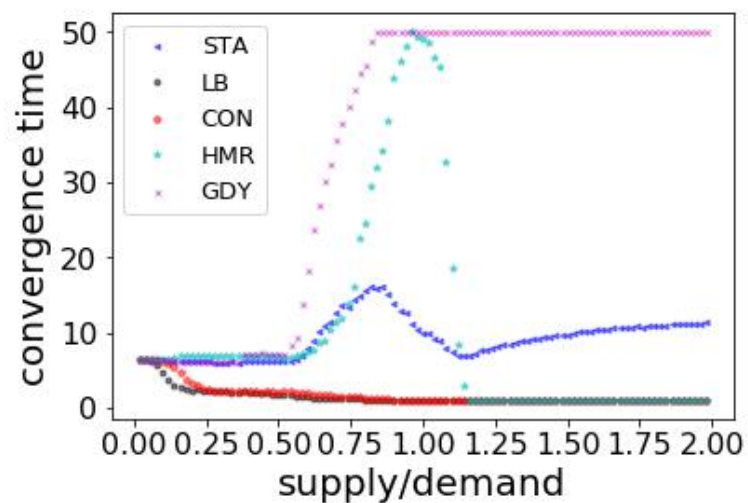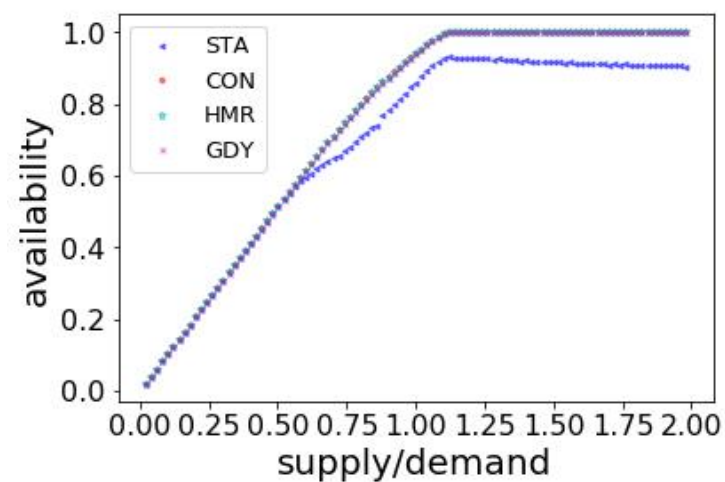

efficiency objective, uniform , 10 region

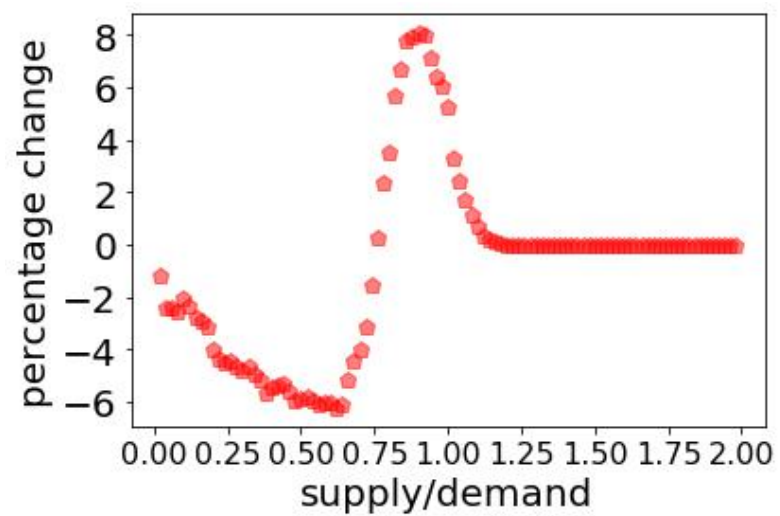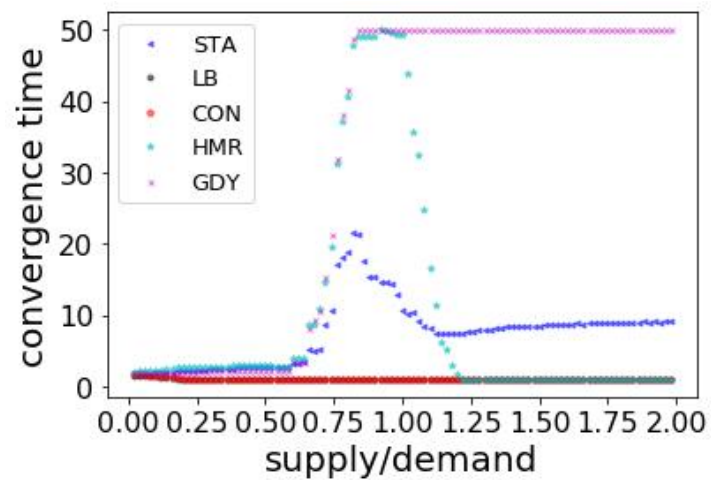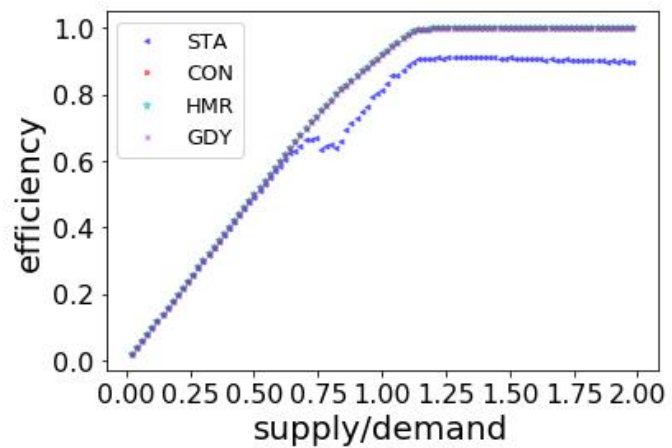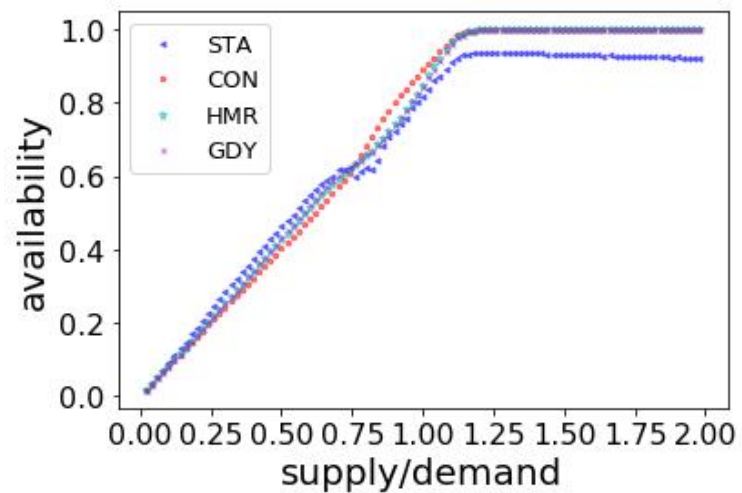

fairness objective, uniform PA old, 10 region

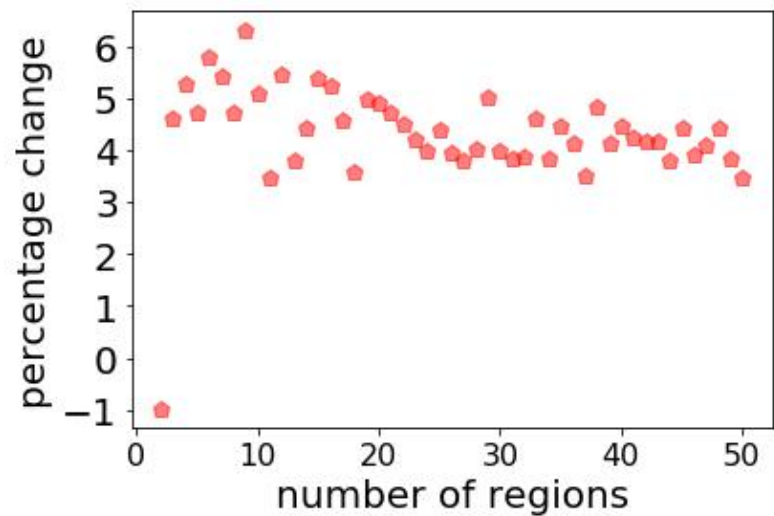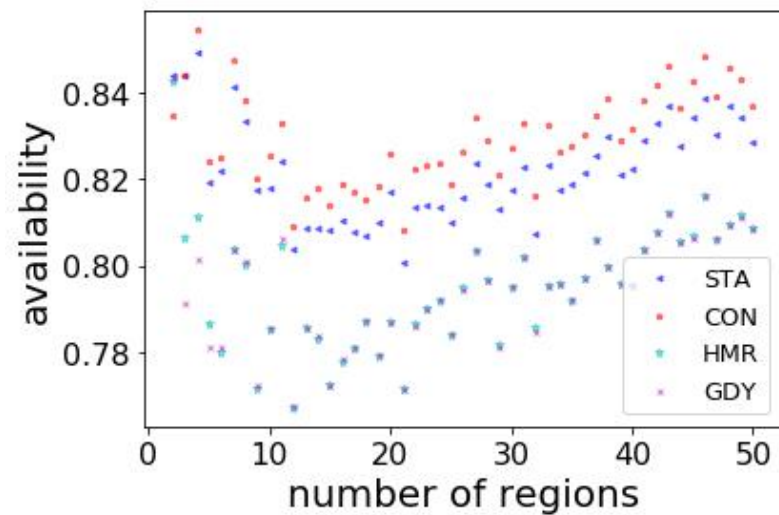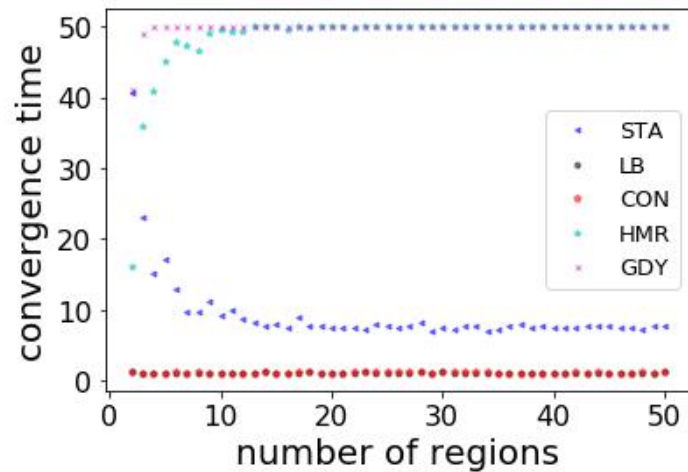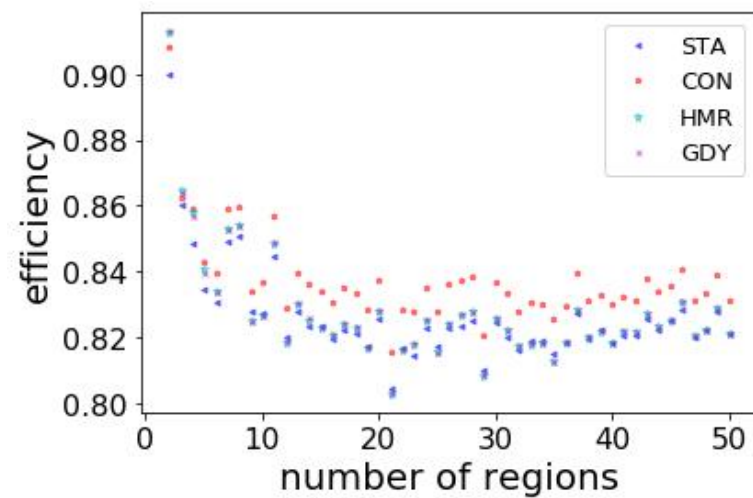

fairness objective , uniform PA power 10, 2-50 region

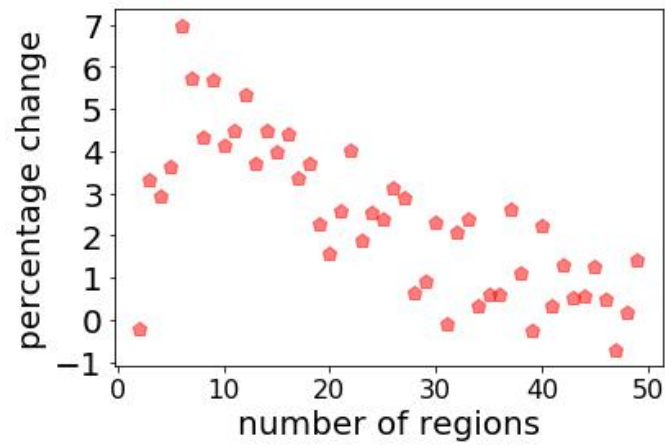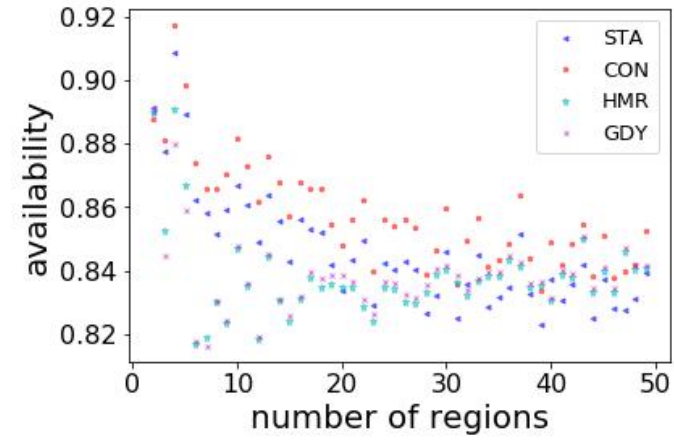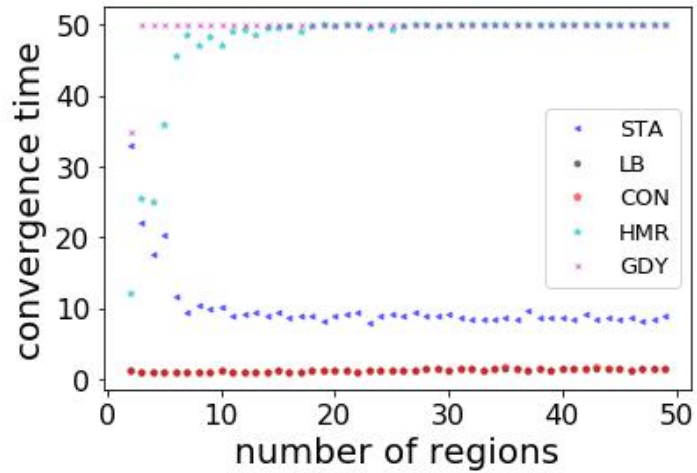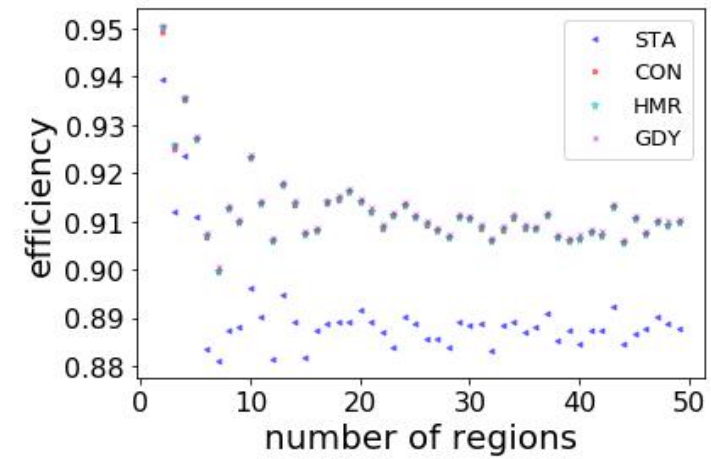

fairness objective , uniform PA power 10, 2-50 region, 5 steps for a change, 100 times change of demand pattern

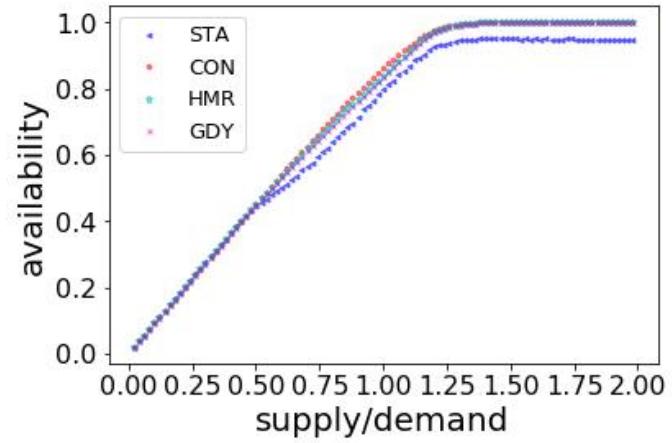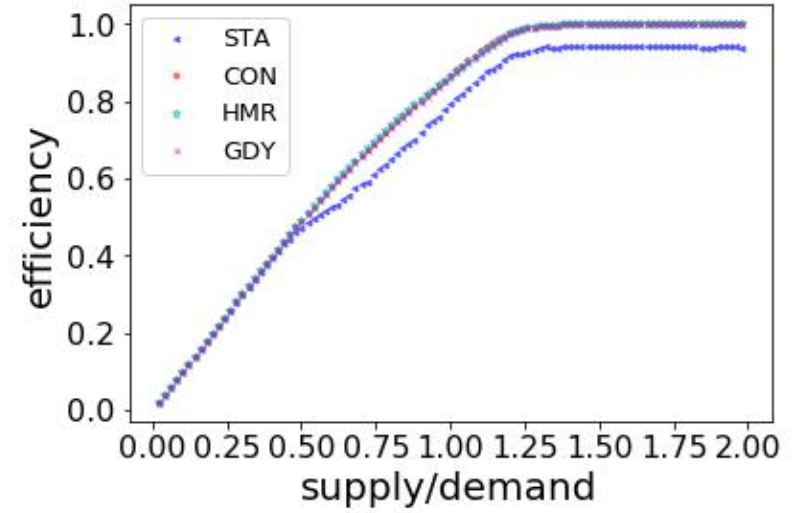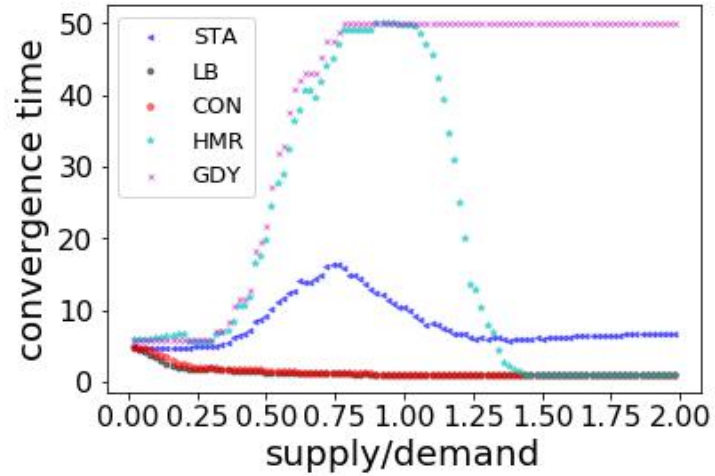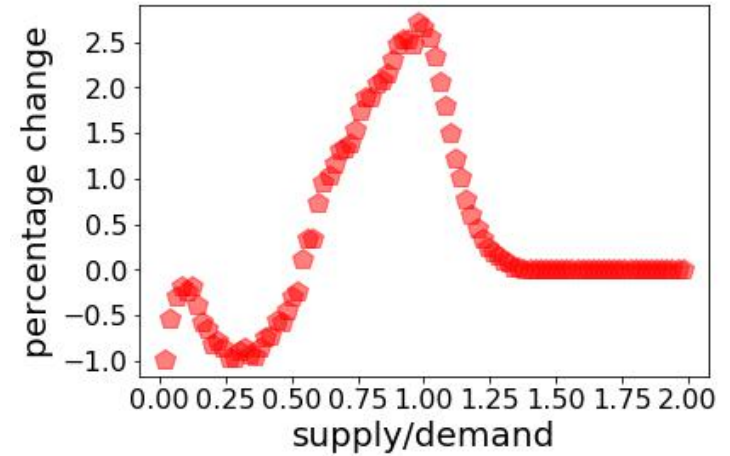

availability objective, uniform PA power 10, 10 region

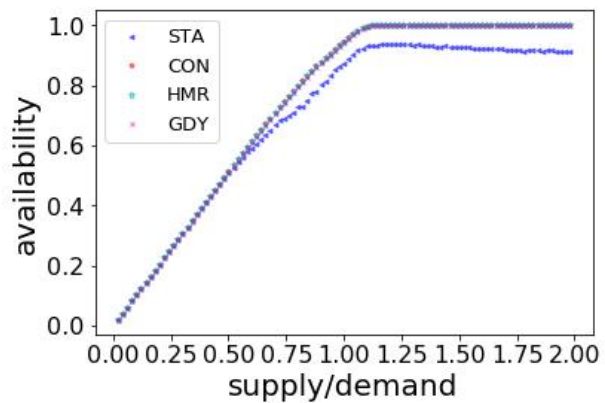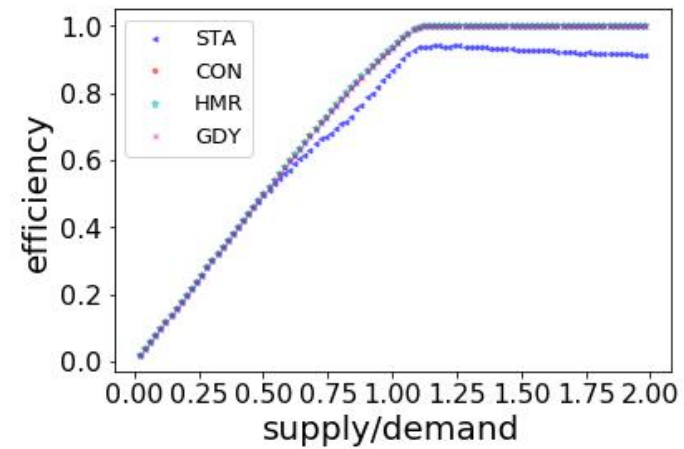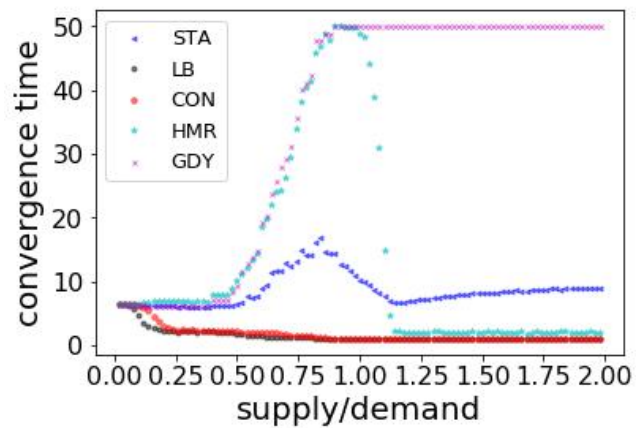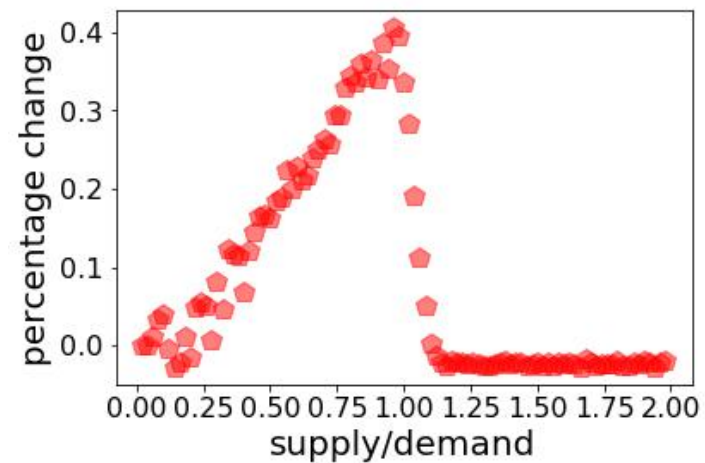

availability objective, uniform, 10 region
